# Supplementary material for: Dendritic small conductance calcium-activated potassium channels activated by action potentials suppress EPSPs and gate spike-timing dependent synaptic plasticity
Source: eLife journal article supplement (doi:10.7554/elife.30333), 2017-10-23
Supplement: supp [file elife-30333-supp-v1.zip]

Archive with 1 entries (1 files):
- elife_poa_e30333_Transparent_Reporting_File.pdf
